# Supplementary material
Source: publisher figshare collection journal article supplement (https://rs.figshare.com/articles/dataset/_/14610232)
Supplement: Supplementary file 1 [file 2]

# SEASONAL AND DIEL CYCLES OF FIN WHALE ACOUSTIC OCCURRENCE NEAR ELEPHANT ISLAND, ANTARCTICA

## -Electronic Supplement-

Elke Burkhardt, Ilse Van Opzeeland, Boris Cisewski, Ramona Mattmüller, Marlene Meister, Elena Schall, Stefanie Spiesecke, Karolin Thomisch, Sarah Zwicker and Olaf Boebel

Corresponding author: Elke Burkhardt, Alfred Wegener Institute Helmholtz Center for Polar and Marine Research, Bremerhaven, Germany ([elke.burkhardt@awi.de](mailto:elke.burkhardt@awi.de), ORCID ID 0000-0002-5128-4176)

Supplement Table S1: List of cetacean sightings collected during Polarstern expedition ANT-XXVIII/4 from March 14 to April 08, 2012: EI = Elephant Island, JI = Joinville Island, SSI = South Shetland Island, (taken from Burkhardt & Lanfredi (2012)).

| <i>Species</i>               | <i>Study Areas</i> |           |            | <i>Total</i> |
|------------------------------|--------------------|-----------|------------|--------------|
|                              | <b>EI</b>          | <b>JI</b> | <b>SSI</b> |              |
| <i>Fin whale</i>             | 116                | 4         | 35         | 155          |
| <i>Humpback whale</i>        | 1                  | 6         | 1          | 8            |
| <i>Antarctic minke whale</i> | 0                  | 2         | 0          | 2            |
| <i>Killer whale</i>          | 0                  | 1         | 0          | 1            |
| <i>undefined large whale</i> | 57                 | 2         | 16         | 75           |
| <i>undefined small whale</i> | 1                  | 0         | 0          | 1            |
| <i>Undefined whale</i>       | 2                  | 4         | 0          | 6            |
| <b><i>Total</i></b>          | <b>177</b>         | <b>19</b> | <b>52</b>  | <b>248</b>   |

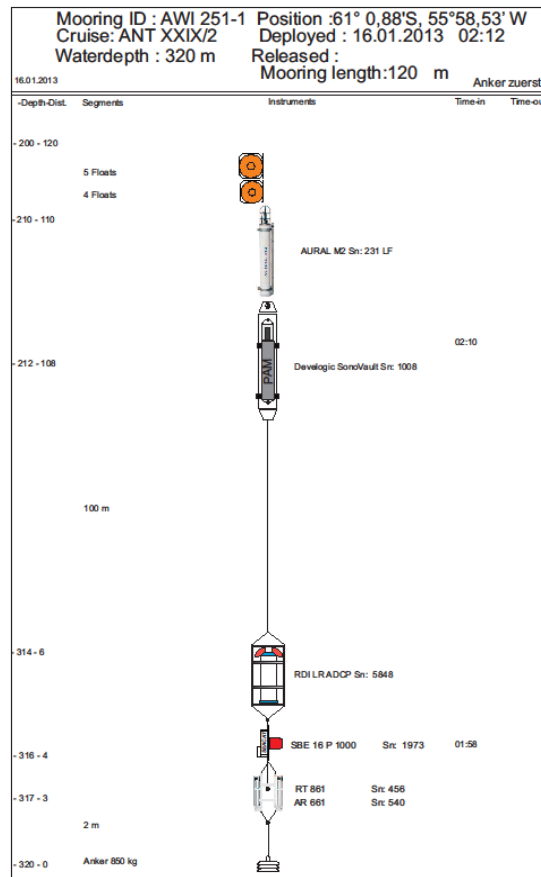

Supplement Figure S1: Schematic of mooring AWI 251-1 deployed near Elephant Island on January 16, 2013 and recovered on February 10, 2016. Two acoustic recording devices of type Aural (deployment depth = 210 m) and SonoVault (deployment depth = 212 m) and an upward looking ADCP (deployment depth = 314 m) were attached. Mooring elements were connected using steel shackles and rings.

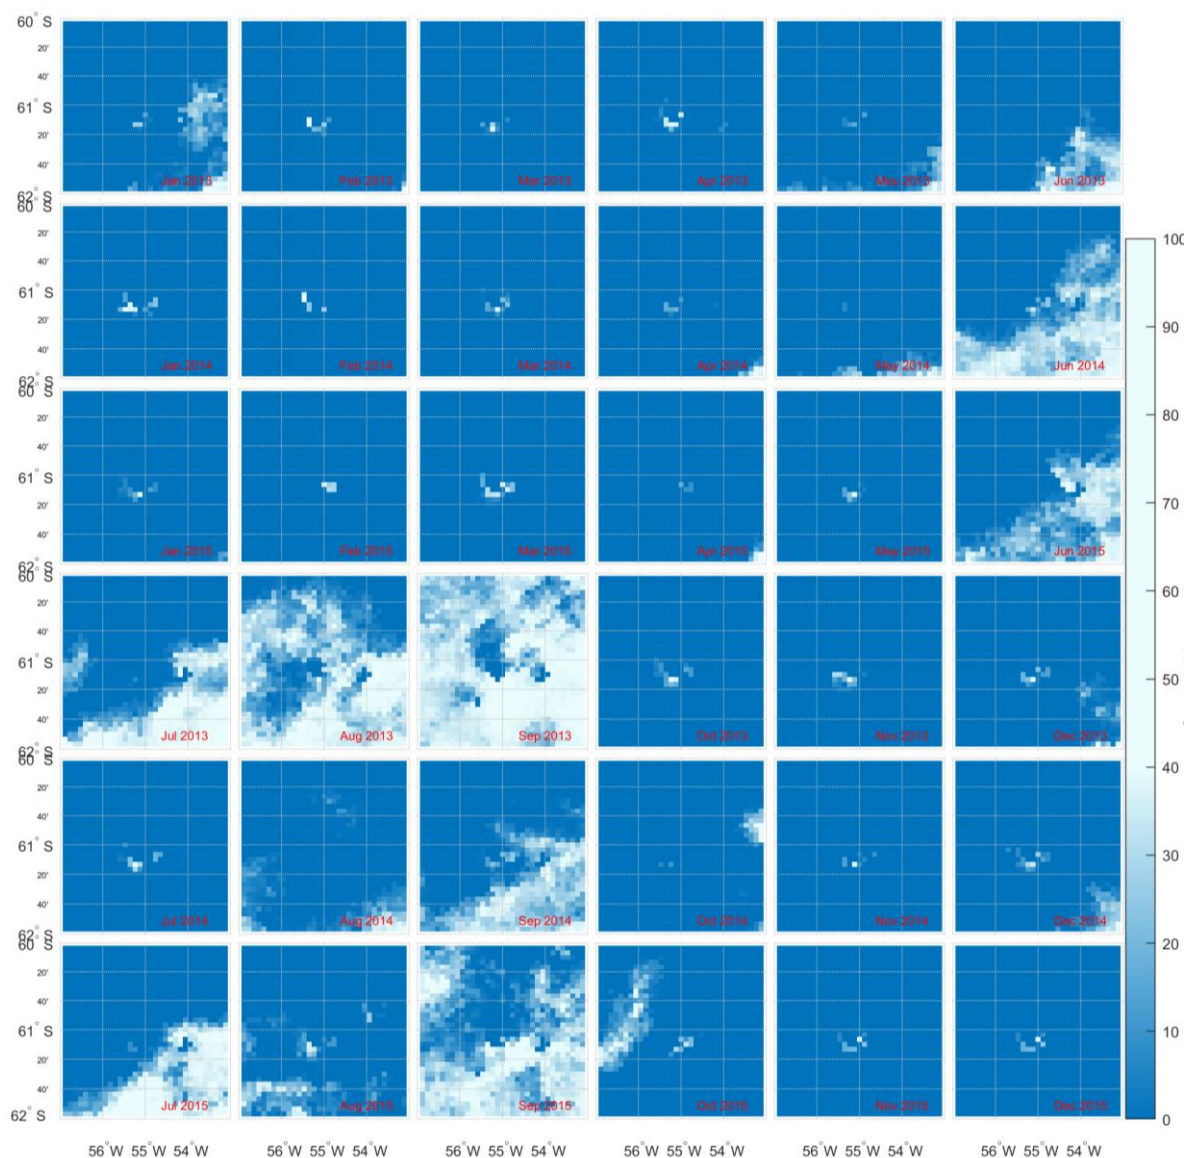

Supplement Figure S2: Monthly averaged sea ice concentration in percent for the period January 2013 - December 2015. Daily satellite sea ice concentration data was processed and provided by the University of Bremen\* at a resolution of 6.25 km × 6.25 km. Map created using Arndt et al. (2013a), Arndt et al. (2013b) and Greene et al. (2017).

\* <https://seaice.uni-bremen.de/sea-ice-concentration/amsre-amsr2/>

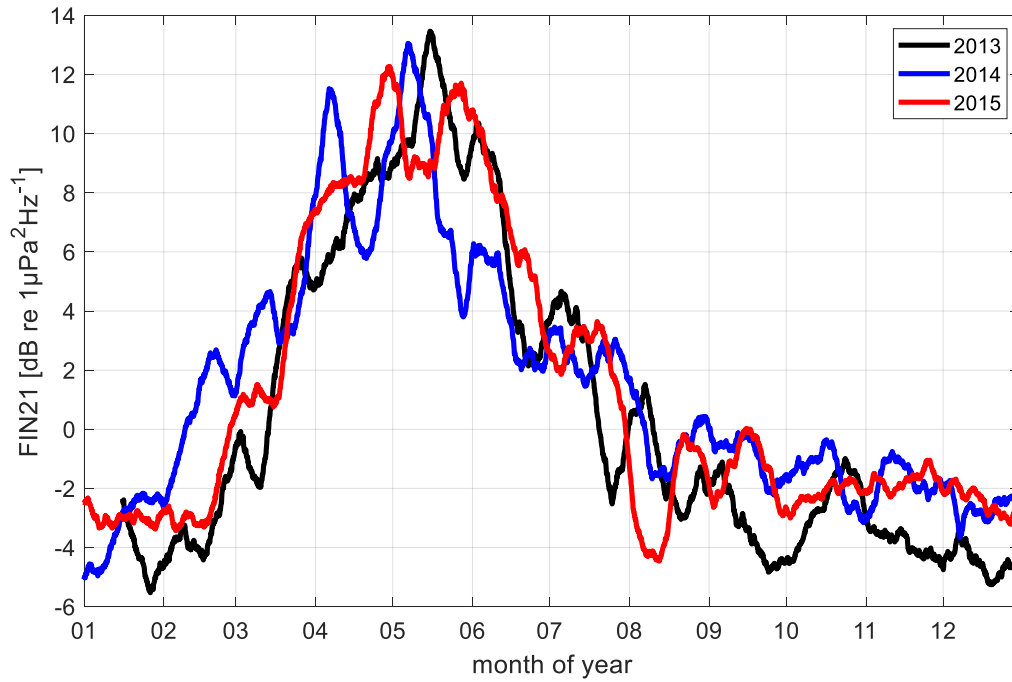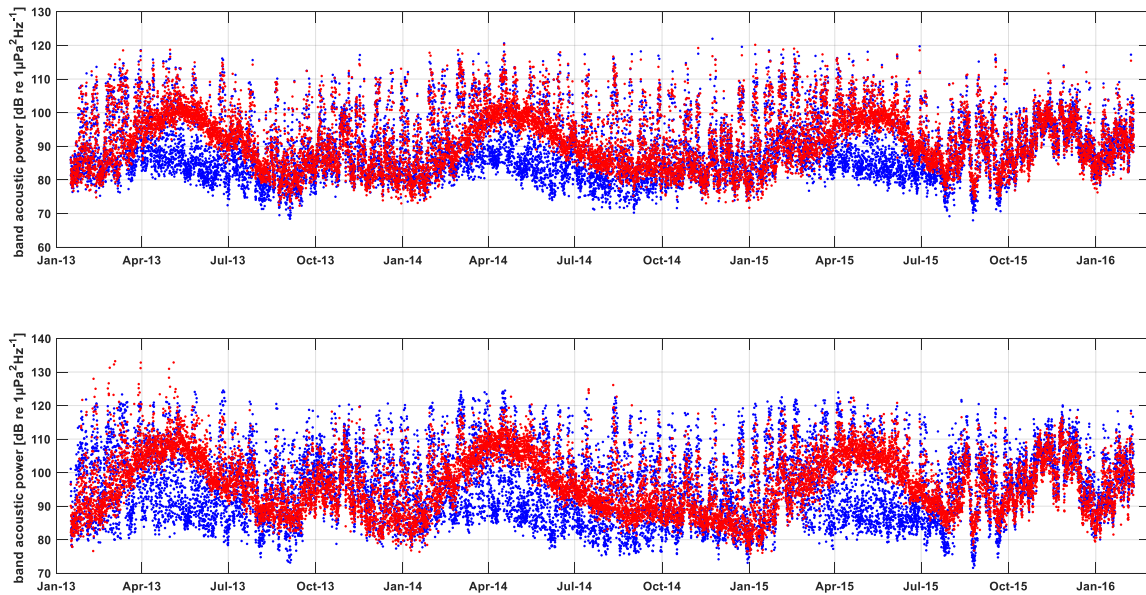

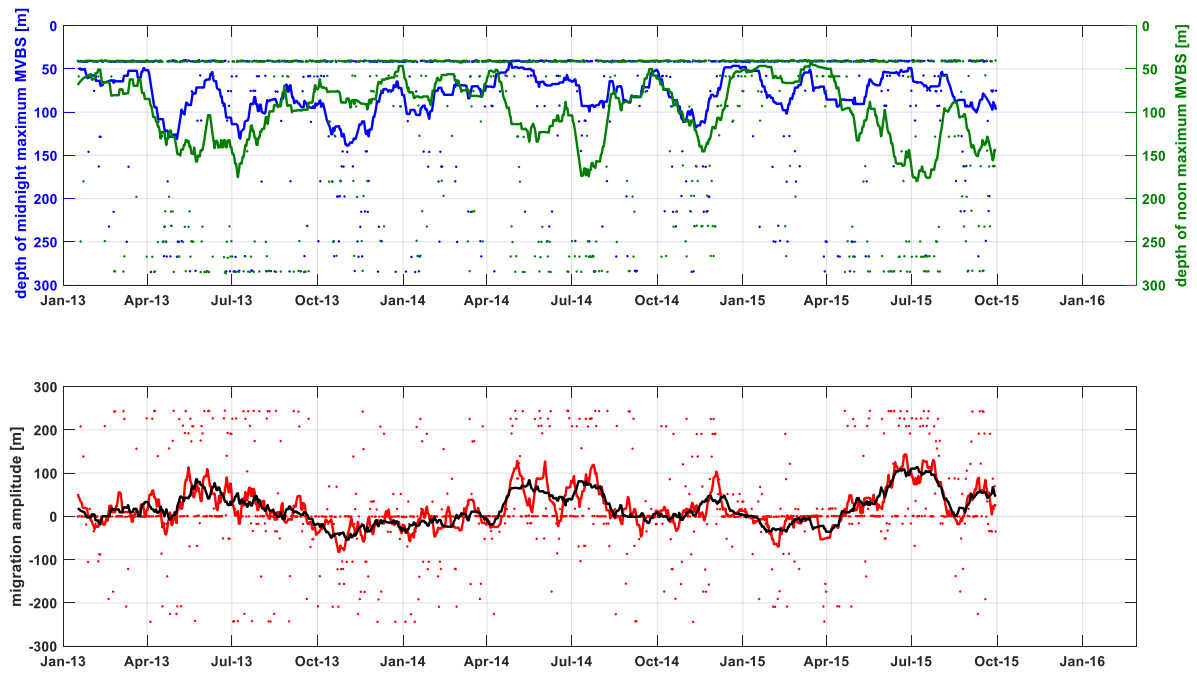

Supplement Figure S5: Top panel: Daily depths of noon (green points) and midnight (blue points) maximum backscatter. Lines: 30-day running means thereof. Bottom panel: Daily (points) migration amplitude (noon minus midnight values) of maximum backscatter depths. Red line: 14-day running mean; black line: 30-day running mean.

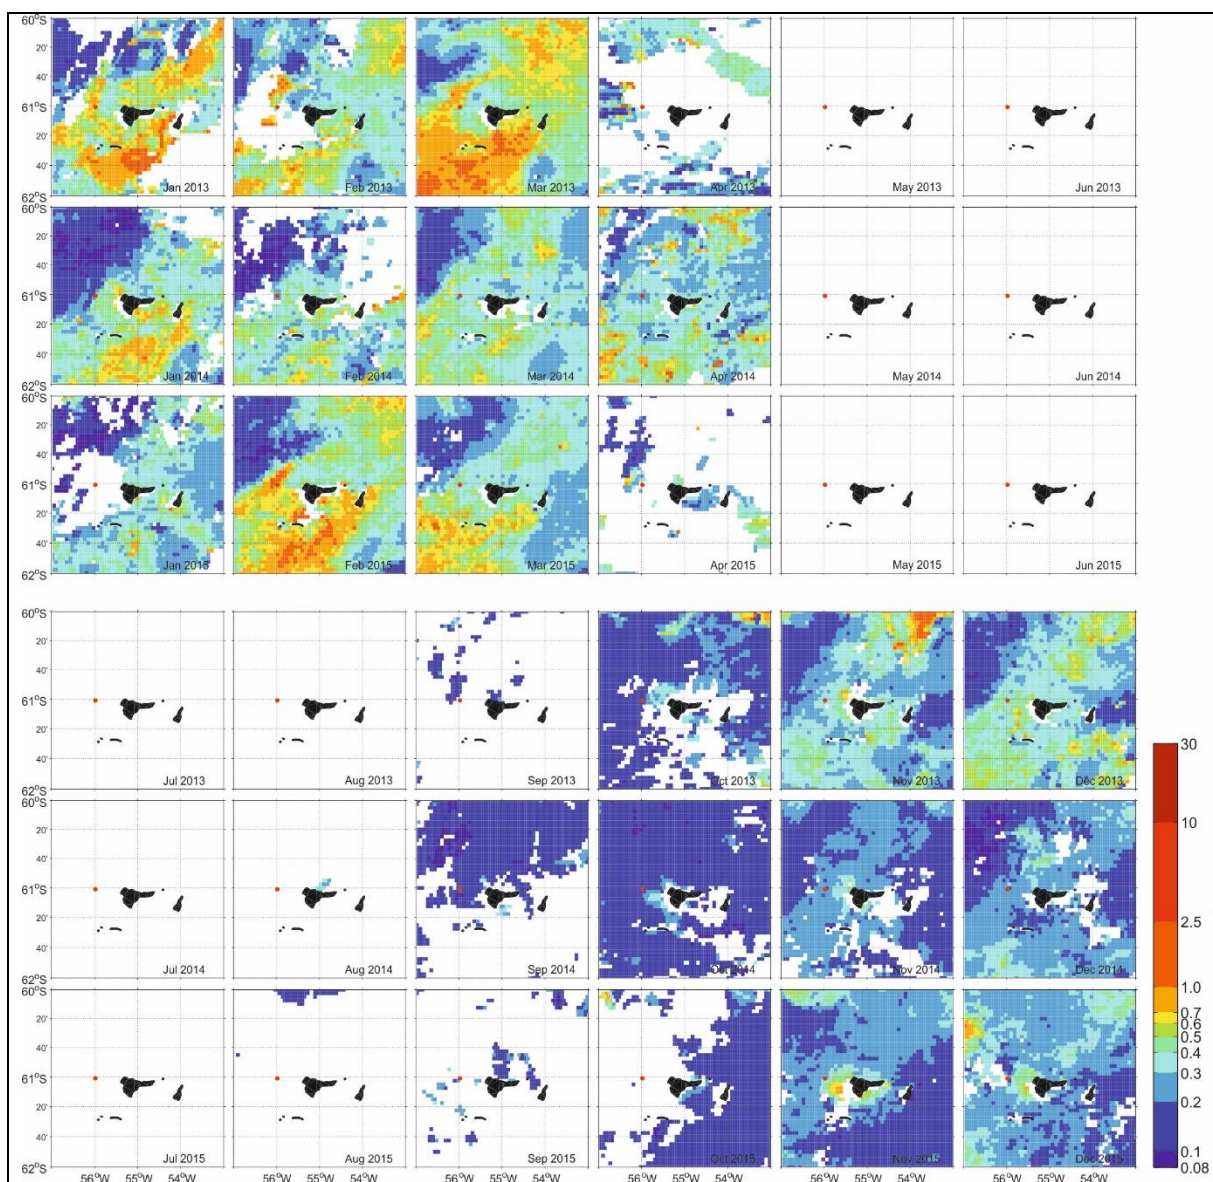

Supplement Figure S6: Monthly composites of (sea surface) Chlorophyll a concentration in  $\text{mg/m}^3$  for the period January 2013-December 2015. Data extracted from Ocean Colour CCI data base\* (OC-CCIv3.1). The mooring location is indicated by a red dot near 61°S 56°W.

\* <https://www.oceancolour.org/browser/>

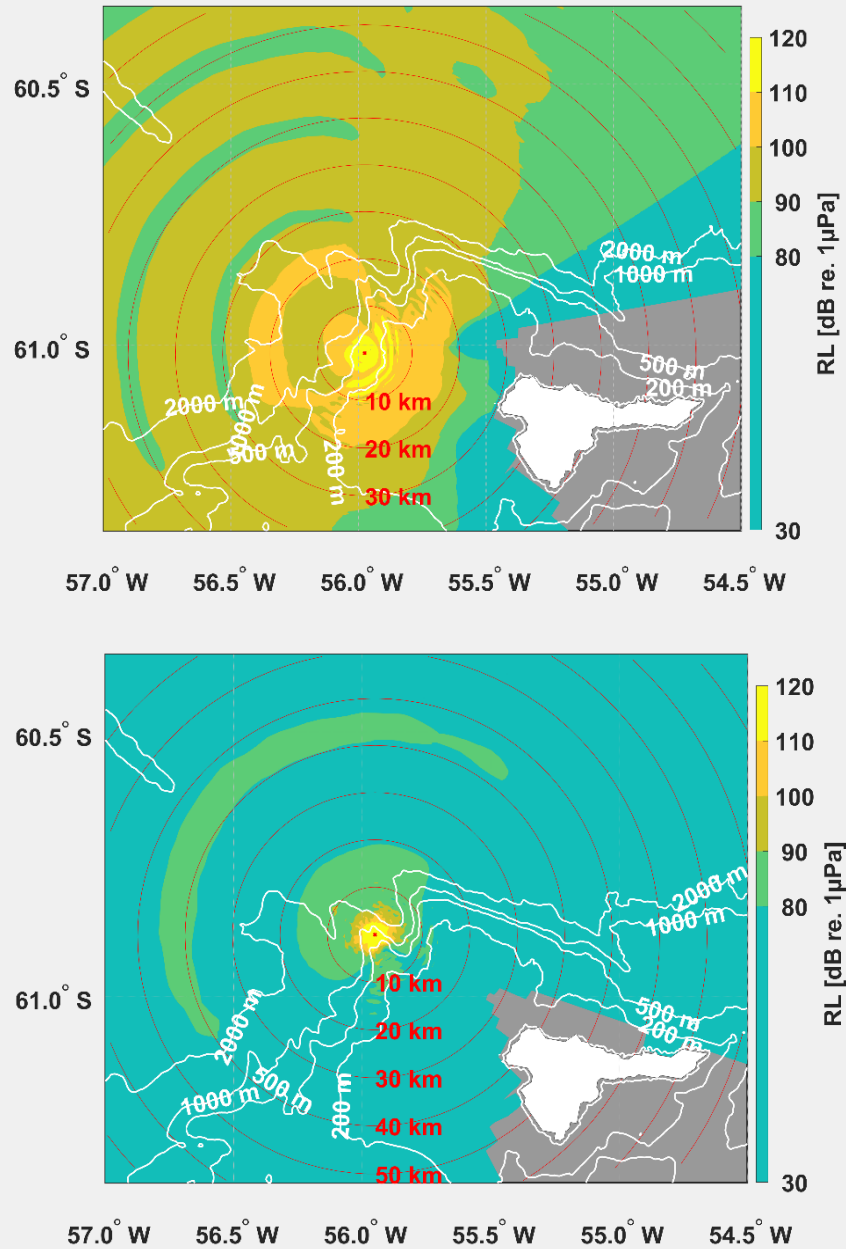

Supplement Figure S7: Received levels at a depth of 21 m from a virtual source of SL = 180 dB re 1  $\mu$ Pa between 18-22 Hz placed at the recorder position EI-AWI (210 m depth, top graph) and EI-Scripps (750 m depth, bottom graph). The configuration serves as proxy for the reverse true situation, i.e. a source at 21 m and the recorder at 210/750 m depth, respectively. Calculations used sound speed profile 001 (summer conditions) collected by Argo float (AWI 0246, WMO 7900409) on 16 Jan 2013 at 60°02.142'S 57°29.25'W. Map created using Arndt et al. (2013a), Arndt et al. (2013b) and Greene et al. (2017).

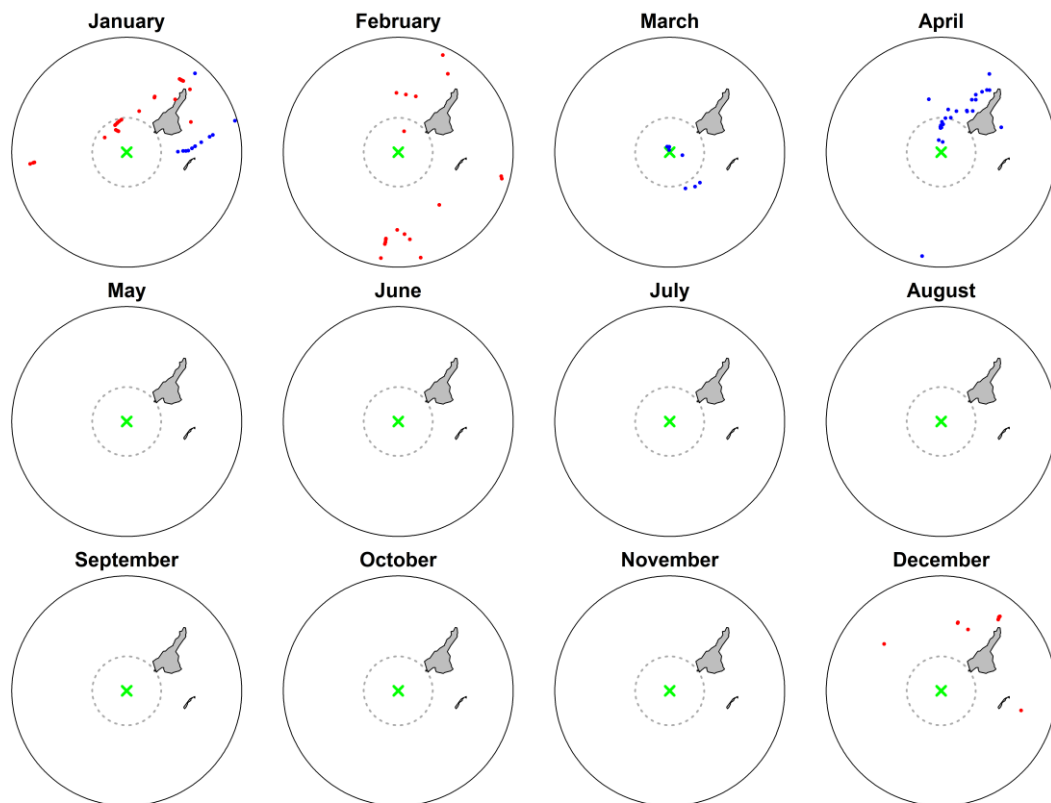

Supplement Figure S8: Fin whale sightings available to us since 2000 in a 30 km radius (dashed grey circle) and 100 km radius (solid black circle) around our recording site off Elephant Island indicated by the green cross. Blue dots = sightings RV Polarstern (n=45), red dots = sightings from various sources (n=66)\*. Figure provided by Ahmed El-Gabbas.

## References:

- Arndt, J. E., Schenke, H. W., Jakobsson, M., Nitsche, F.-O., Buys, G., Goleby, B., Rebesco, M., Bohoyo, F., Hong, J. K., Black, J., *et al.* 2013 The International Bathymetric Chart of the Southern Ocean (IBCSO) Version 1.0 - A new bathymetric compilation covering circum-Antarctic waters. *Geophysical Research Letters*. **40**, 3111-3117. (<https://doi.org/10.1002/grl.50413>)
- Arndt, J. E., Schenke, H. W., Jakobsson, M., Nitsche, F.-O., Buys, G., Goleby, B., Rebesco, M., Bohoyo, F., Hong, J. K., Black, J., *et al.* 2013 The International Bathymetric Chart of the Southern Ocean (IBCSO) Version 1.0. PANGAEA. (<https://doi.org/10.1594/PANGAEA.805736>)
- Greene, C. A., Gwyther, D. E., Blankenship, D. D. 2017 Antarctic Mapping Tools for Matlab. *Computers & Geosciences*. **104**, 151-157. (<https://doi.org/10.1016/j.cageo.2016.08.003>)
- Burkhardt, E.; Lanfredi, C. 2012 Fall feeding aggregations of fin whales off Elephant Island (Antarctica). Paper SC/64/SH9 presented at the 64<sup>th</sup> Scientific Committee Meeting of the IWC. (<hdl:10013/epic.39404.d001>)
- Burkhardt, E. 2013 Whale sightings during POLARSTERN cruise ANT-XXIX/2. Alfred Wegener Institute, Helmholtz Centre for Polar and Marine Research, Bremerhaven, PANGAEA, (<https://doi.org/10.1594/PANGAEA.819866>)
- Burkhardt, E. 2014 Whale sightings during POLARSTERN cruise ANT-XXIX/3. Alfred Wegener Institute, Helmholtz Centre for Polar and Marine Research, Bremerhaven, PANGAEA, (<https://doi.org/10.1594/PANGAEA.840382>)

\* (Inaturalist (n=1), OBIS-SEAMAP (n=18), Scheidat, M.; Herr, H. (2018): Aerial cetacean survey Southern (n=5), Herr, H.; Viquerat, S.; Siebert, U. (2018): Ship based cetacean survey Southern Ocean 2016. (n=26), SOWER (n=16)

Burkhardt, E. 2013 Whale sightings during POLARSTERN cruise ANT-XXVIII/4. Alfred Wegener Institute, Helmholtz Centre for Polar and Marine Research, Bremerhaven, PANGAEA, (<https://doi.org/10.1594/PANGAEA.819863>)

Burkhardt, E. 2013 Whale sightings during POLARSTERN cruise ANT-XXVIII/4. Alfred Wegener Institute, Helmholtz Centre for Polar and Marine Research, Bremerhaven, PANGAEA, (<https://doi.org/10.1594/PANGAEA.819863>)

Burkhardt, E. 2020: Whale sightings during Polarstern cruise PS112 (ANT-XXXIII/3). Alfred Wegener Institute, Helmholtz Centre for Polar and Marine Research, Bremerhaven, PANGAEA, (<https://doi.org/10.1594/PANGAEA.923117>)

Herr, H.; Viquerat, S.; Siebert, U. 2018 Ship based cetacean survey Southern Ocean 2016. PANGAEA, (<https://doi.org/10.1594/PANGAEA.894912>)

Inaturalist, (<https://www.inaturalist.org/observations/9993981>)

Halpin, P.N., A.J. Read, E. Fujioka, B.D. Best, B. Donnelly, L.J. Hazen, C. Kot, K. Urian, E. LaBrecque, A. Dimatteo, J. Cleary, C. Good, L.B. Crowder, and K.D. Hyrenbach. 2009. OBIS-SEAMAP: The world data center for marine mammal, sea bird, and sea turtle distributions. *Oceanography* 22(2):104–115, (<https://doi.org/10.5670/oceanog.2009.42>.) Accessed on August 22, 2018

Scheidat, M.; Herr, H. 2018 Aerial cetacean survey Southern Ocean 2006/2007. PANGAEA, (<https://doi.org/10.1594/PANGAEA.894937>)

Southern Ocean Whale and Ecosystem Research Programme (SOWER) (<https://iwc.int/sower>; 2009-2010). Data available upon request from the IWC secretariat.
